# Supplementary material for: Ancient Migratory Events in the Middle East: New Clues from the Y-Chromosome Variation of Modern Iranians
Source: PLoS One. 2012 Jul 18;7(7):e41252. doi: 10.1371/journal.pone.0041252 (PMC3399854; doi:10.1371/journal.pone.0041252)
Supplement: Table S1 — Absolute frequencies of Y-chromosome haplogroups and subhaplogroups in the 44 populations included in the PCA. (XLSX) [file pone.0041252.s005.xlsx]

## Sheet: Table 2
	Table S1. Absolute frequencies of Y-chromosome haplogroups and subhaplogroups in the 44 populations included in the PCA.
			Hg	Y*(xBT)	B	C	E	E	E	E	E	E	E	E	F	G	H	I	J1	J1	J2	J2	J2	J2	J2	J2	L	L	L	NO	N	O	P	Q	R	R2	R1	R1a	R1b	R1b	R1b	T
	County/Region (Population)	COD	N	M91	M60	M216	M33	M75	P2	M2	M35	M78	M81	M123	M89	M201	M69	M170	M267	PAGE08	M172	M47	M67	M92	M410	M12	M76	M317	M357	M214	LLY22g	M175	M74	M242	M207	M124	M173	M17	M343	M73	M269	M70	not included	Reference
	Iran/Azerbaijan Gharbi+Tehran (Assyrian)	AzG+T-As	48			1						1		1		4			7				1		6									2	1		2	4			14	4		Present study
	Iran/Azerbaijan Gharbi (Azeri)	AzG-Az	63									1		6		5				3		3	2		8	1			1	1				3				12	2		9	5	1	Present study
	Iran/Fars+Isfahan (Persian)	F+I-Pe	55			1					1	1		3		5	1		1	5		3	3	1	9		1		2		1			3		1		4			5	3	1	Present study
	Iran/Gilan (Gilak)	GIL-Gi	64									1		1		10	1	1	7	1		2	3		10		1		1					1		2	2	6	1		12		1	Present study
	Iran/Golestan (Turkmen)	GOL Tu	68								1	2				4	1			4		1		1	4				4		2			29		1		10			3	1		Present study
	Iran/Hormozgan (Bandari+Afro-Iranian)	HOR-B+AI	143		3	3		3		15	1	3		1	1	11	1	1		5			2	2	9	6	7	7						3	1	9	1	30			13	4	1	Present study
	Iran/Hormozgan/Qeshmi	HOR-G	49		4					1						5	1			4		3	3		11		4							1				9				2	1	Present study
	Iran/Khorasan (Persian)	KHO-Pe	59											2		8	2		3	1		2			7	1			2			2		4	2	2	1	12	1	1	2	3	1	Present study
	Iran/Khuzestan (Arab)	KHU-Ar	57									1		1		12	1		1	18	1	4		1	8			1								2	1	2			3			Present study
	Iran/Kurdistan (Kurd)	KUR-Ku	59									4		8		7		1	1	2		1	3	1	9		1									2	1	12	1			5		Present study
	Iran/Lorestan (Lur)	LOR-Lo	50									5		1		8			1	2		3	2		4			2						3		2		3			12	2		Present study
	Iran/Mazandaran (Mazandarani)	MAZ-Ma	72			3								4		15	4		3	4		5	1		13	3		1							1	3		7			3		2	Present study
	Iran/Sistan Baluchestan (Baluch)	SB-Ba	24							1						1				2				3	5		2		2					1			1	6						Present study
	Iran/Tehran (Armenian)	TEH-Ar	34									1		1		7		2	1			2	3		3	2		1	1						1			1			8			Present study
	Iran/Yazd+Tehran (Zoroastrian)	Y+Z-Zo	47			2						6		3		2			1	3		3			12			2				1		2				6			4			Present study
	Iran/Yazd (Persian)	YAZ-Pe	46									2		3		7			1	2		1			11	2	1		1							2	2	6	2			3		Present study
	Albania	ALB	119									37		2		2		23		6			3	1		17												6			22			Battaglia et al., 2009
	Balkarian	BK	38									1				11	1	1					2		6	1		2								3	2	5			3			Battaglia et al., 2009
	Bosnia	BOS	255								2	35				5		141		3			4	1	5	9					5							35			10			Battaglia et al., 2009
	Croatia	CRO	118									10		1		5		47					1		1	5					2							35			11			Battaglia et al., 2009
	Czech Republic	CZE	75													3		8								4					2						1	31			25	1		Battaglia et al., 2009
	Egypt (Arab)	EG-A	147	4			1			3	4	26	12	10		13		1	2	29			4		12	1										1	3	4			3	12	2	Luis et al., 2004
	Ethiopia (Amhara)	ETA	48	7	1				5		5	11		1		0			5	10			1																			2		Semino et al., 2002
	Ethiopia (Oromo)	ETO	78	8	1			1	12		17	28		4					2							1																4		Semino et al., 2002
	Georgia	GEO	66									1		1		21	0	1		3		1	10	2	8				1							3		7			6	1		Battaglia et al., 2009
	Greece	GRE	149			1						30		3		4	1	26	2	1			6	3	7	11		1										21		2	24	5	1	Battaglia et al., 2009
	Hungary	HUG	53									4		1		1		7					1															30			8	1		Battaglia et al., 2009
	India	INDIA	728			13									38	9	192		2						28	38	46		3			167		3	2	68		115			4			Sengupta et al., 2006
	Iraq (Marsh Arab)	IRM	143								3	1		5		2			10	106	5						1							4		2					4			Al-Zahery et al., 2011
	Iraq/Baghdad	IRQ	154							2		12		7		3		1	7	41	2	4	8	2	17	4			1					3				13			17	10		Al-Zahery et al., 2003
	Italy/Sardinia	SARD	520																																									Unpublished data
	Oman	OMA	121	1		4		2		8		2		15		2	2		1	45			1		6	5				1			1				1	11			1	10	2	Luis et al., 2004
	Pakistan	PAK	176			13				1		2				11	11	1	6				2		15	4	9	2	12			4		6	6	13	1	43		8	5		1	Sengupta et al., 2006
	Poland	POL	99									4				0		18		1						1					1							56			18			Battaglia et al., 2009
	Qatar	QAT	72		2			3	1	2		3		1		2	1		1	41		1.008	1.008		2.016	2.016	2									0.864		4.968			1.008			Cadenas et al., 2008
	Saudi Arabia	SAR	157		2.9987	1.9939				11.9948	4.0035	1.0048		7.0022		5.0083	2.9987		11	52		4.0035	1.0048		17.9922	1.9939	1.9939		1.0048			1.0048		4				8.007			2.9987	8.007	5	Abu-Amero et al., 2009
	Slovenia	SLV	75									2				2		23		1				1	1													29			16			Battaglia et al., 2009
	Tunisia	TUN	148				1			2	5	8	56	4	7				2	46		1			4								1				6				4	1		Arredi et al., 2004
	Turkey/Central	C-TK	152			2						3	1	9		17	1	8	4	8		1	4	6	30	1		1			7			3		2		8	1		29	4	2	Cinnioglu et al., 2004
	Turkey/East	E-TK	208			1						10		13		26	1	4	10	10		2	6	2	33	6		13			8	1		6		2	1	18	4		25	5	1	Cinnioglu et al., 2004
	Turkey/West	W-TK	163	2		4			2	1		13		7		14	1	16	2	13		3	9	6	16	2		6			5			1		1		10		3	22	4		Cinnioglu et al., 2004
	Ukraine	UKR	92									7		1		3	1	18					1	1	1	3					6			1				46			2	1		Battaglia et al., 2009
	United Arab Emirates	UAE	163			2				9		13	1	5	6	7	7			57		2.952	0.984	1.968	9.02	1.968	4		1			2		3			1	11.972	1		6.068	8	1	Cadenas et al., 2008
	Yemen	YEM	62						1	2	2			5		1			3	42			2.976		2.976																			Cadenas et al., 2008
	References
	Abu-Amero KK, Hellani A, González AM, Larruga JM, Cabrera VM, et al. (2009) Saudi Arabian Y-Chromosome diversity and its relationship with nearby regions. BMC Genet 10: 59.
	Al-Zahery N, Semino O, Benuzzi G, Magri C, Passarino G, et al. (2003) Y-chromosome and mtDNA polymorphisms in Iraq, a crossroad of the early human dispersal and of post-Neolithic migrations. Mol Phylogenet Evol 28: 458-472.
	Al-Zahery N, Pala M, Battaglia V, Grugni V, Hamod MA, et al. (2011) In search of the genetic footprints of Sumerians: a survey of Y-chromosome and mtDNA variation in the Marsh Arabs of Iraq. BMC Evol Biol 11: 288.
	Arredi B, Poloni ES, Paracchini S, Zerjal T, Fathallah DM, et al. (2004) A predominantly neolithic origin for Y-chromosomal DNA variation in North Africa. Am J Hum Genet 75: 338-345.
	Battaglia V, Fornarino S, Al-Zahery N, Olivieri A, Pala M, et al. (2009) Y-chromosomal evidence of the cultural diffusion of agriculture in Southeast Europe. Eur J Hum Genet 17: 820-830.
	Cadenas AM, Zhivotovsky LA, Cavalli-Sforza LL, Underhill PA, Herrera RJ (2008) Y-chromosome diversity characterizes the Gulf of Oman. Eur J Hum Genet 16: 374-386.
	Cinnioğlu C, King R, Kivisild T, Kalfoğlu E, Atasoy S, et al. (2004) Excavating Y-chromosome haplotype strata in Anatolia. Hum Genet 114: 127-148.
	Luis JR, Rowold DJ, Regueiro M, Caeiro B, Cinnioğlu C, et al. (2004) The Levant versus the Horn of Africa: evidence for bidirectional corridors of human migrations. Am J Hum Genet 74: 532-544.
	Semino O, Santachiara-Benerecetti AS, Falaschi F, Cavalli-Sforza LL, Underhill PA (2002) Ethiopians and Khoisan share the deepest clades of the human Y-chromosome phylogeny. Am J Hum Genet 70: 265-268.
	Sengupta S, Zhivotovsky LA, King R, Mehdi SQ, Edmonds CA, et al. (2006) Polarity and temporality of high-resolution y-chromosome distributions in India identify both indigenous and exogenous expansions and reveal minor genetic influence of Central Asian pastoralists. Am J Hum Genet 78: 202-221.
