# Supplementary material for: Ancient Migratory Events in the Middle East: New Clues from the Y-Chromosome Variation of Modern Iranians
Source: PLoS One. 2012 Jul 18;7(7):e41252. doi: 10.1371/journal.pone.0041252 (PMC3399854; doi:10.1371/journal.pone.0041252)
Supplement: Table S2 — Haplogroup J1-M267* frequencies and variances. (XLSX) [file pone.0041252.s006.xlsx]

## Sheet: Table S2
Table S2. Haplogroup J1-M267* frequencies and variances.
Country/Region (Population)	N	J1-M267*		Reference
		Frequency (%)	Variance (a,b)
Africa
Algeria	20	5.00		Semino et al., 2004; Al-Zahery et al., 2011
Egypt	147	1.36		Luis et al., 2004
Ethiopia (Amhara)	48	10.42		Semino et al., 2004; Al-Zahery et al., 2011
Ethiopia (Oromo)	78	2.56		Semino et al., 2004; Al-Zahery et al., 2011
Guinea Bisseau	282	0.00	0.000	Rosa et al., 2007
Kenya (Bantu)	29	0.00	0.000	Luis et al., 2004
Nigeria	1113	0.00	0.000	Veeramah et al., 2010
South Cameroon (Bantu)	14	0.00	0.000	Luis et al., 2004
Sudan/Khartoum	35	0.00	0.000	Tofanelli et al., 2009
Sudan/Dinka	26	0.00	0.000	Hassan et al., 2008
Sudan (Arabic)	35	0.00	0.000	Hassan et al., 2008
Sudan/Nilo-Saharan	61	3.28		Hassan et al., 2008
Tunisia	73	1.37		Semino et al., 2004; Al-Zahery et al., 2011
Europe
Albania	55	0.00	0.000	Battaglia et al., 2009; Al-Zahery et al., 2011
France (Bearnais)	26	0.00	0.000	Semino et al., 2004
Bosnia	255	0.39		Battaglia et al., 2009; Al-Zahery et al., 2011
Bosnia (Bosniacs)	84	0.00	0.000	Battaglia et al., 2009; Al-Zahery et al., 2011
Bosnia (Serbs)	81	1.23		Battaglia et al., 2009; Al-Zahery et al., 2011
Bosnia (Croats)	90	0.00	0.000	Battaglia et al., 2009; Al-Zahery et al., 2011
Croatia	89	0.00	0.000	Battaglia et al., 2009; Al-Zahery et al., 2011
Croatia/Osijek	29	0.00	0.000	Battaglia et al., 2009; Al-Zahery et al., 2011
Czech Republic	75	0.00	0.000	Battaglia et al., 2009; Al-Zahery et al., 2011
Denmark	80	0.00	0.000	Capelli et al., 2003
England	500	0.00	0.000	Capelli et al., 2003
France (Basque)	44	0.00	0.000	Semino et al., 2004
FYROM	64	0.00	0.000	Battaglia et al., 2009; Al-Zahery et al., 2011
Germany	80	0.00	0.000	Capelli et al., 2003
Grecce	92	1.09		Battaglia et al., 2009; Al-Zahery et al., 2011
Greece/Macedonia	57	1.75		Battaglia et al., 2009; Al-Zahery et al., 2011
Hungary	53	0.00	0.000	Battaglia et al., 2009; Al-Zahery et al., 2011
Italy/North East	68	0.00	0.000	Battaglia et al., 2009; Al-Zahery et al., 2011; Present paper
Italy/Sardinia	522	0.00	0.000	Zei et al. 2003; Semino et al. 2004; Unpublished data
Italy/Sicily	42	2.38		Semino et al., 2004; Al-Zahery et al., 2011
Italy/South Central	102	2.94		Semino et al., 2004; Al-Zahery et al., 2011
Italy/Piedmont	200	0.00	0.000	Present study
Poland	99	0.00	0.000	Battaglia et al., 2009; Al-Zahery et al., 2011
Russia/Kashin	73	0.00	0.000	Balanovsky et al., 2008
Russia/Krasnoborsk	91	0.00	0.000	Balanovsky et al., 2008
Russia/Livni	110	0.00	0.000	Balanovsky et al., 2008
Russia/Mezen	54	0.00	0.000	Balanovsky et al., 2008
Russia/Porhov	57	0.00	0.000	Balanovsky et al., 2008
Slovenia	75	1.33		Battaglia et al., 2009; Al-Zahery et al., 2011
Spain/Andalusia	93	1.08		Semino et al., 2004
The Netherlands	34	0.00	0.000	Semino et al., 2004
Ukraine	92	0.00	0.000	Battaglia et al., 2009; Al-Zahery et al., 2011
Asia Minor
Turkey/ Area 1	52	1.92		Cinnioglu et al., 2004
Turkey/ Area 2	29	3.45		Cinnioglu et al., 2004
Turkey/ Area 3	83	6.02		Cinnioglu et al., 2004
Turkey/ Area 4	82	6.10		Cinnioglu et al., 2004
Turkey/ Area 5	43	0.00	0.000	Cinnioglu et al., 2004
Turkey/ Area6	33	0.00	0.000	Cinnioglu et al., 2004
Turkey/ Konya + Area 7	90	3.33		Cinnioglu et al. 2004; Al-Zahery et al. 2011
Turkey/ Area 8	30	0.00	0.000	Cinnioglu et al., 2004
Turkey/ Istanbul + Area 9	81	1.23		Cinnioglu et al. 2004; Al-Zahery et al. 2011
Turkey Areas 1+2+7+9			0.746 (6)	Cinnioglu et al., 2004
Turkey Areas 3+4+5			0.674 (10)	Cinnioglu et al., 2004
Turkey (Assyrian)	25	16.00		Chiaroni et al., 2010
Caucasus
Balkarians	38	0.00	0.000	Battaglia et al., 2009; Al-Zahery et al., 2011
Georgia	66	3.03		Battaglia et al., 2009; Al-Zahery et al., 2011
Middle East
Assyrians(c)			0.154 (10)	Chiaroni et al., 2010
Druze	243	1.23		Shlush et al., 2008; Chiaroni et al., 2010; Al-Zahery et al., 2011
Iraq (Assyrian)	28	17.86		Chiaroni et al., 2010
Iraq/Baghdad	154	4.55		Al-Zahery et al., 2011
Iraq (Kurd)	93	4.30	0.531 (4)	Chiaroni et al., 2010
Iraq/Nassiriya	56	1.79		Tofanelli et al., 2009
Iraq (Marsh Arab)	143	6.99	0.290 (10)	Al-Zahery et al., 2011
Israel (Ashkenazi)	77	0.00	0.000	Semino et al., 2004; Al-Zahery et al., 2011
Jordan	76	0.00	0.000	Chiaroni et al., 2010
Kuwait	53	1.89		Al-Zahery et al., 2011
Lebanon	40	2.50		Semino et al., 2004; Al-Zahery et al., 2011
Negev (Bedouin)	28	3.57		Cann et al., 2002
Oman	121	0.83		Luis et al., 2004
Palestine	65	0.00	0.000	Chiaroni et al., 2010; Al-Zahery et al., 2011
Qatar	72	1.39		Cadenas et al., 2008
Saudi Arabia	12	0.00	0.000	Chiaroni et al., 2010; Tofanelli et al., 2009
Syria + Israel			0.263 (5)	Chiaroni et al., 2010
Syria/Damascus	93	0.00	0.000	Chiaroni et al., 2010
Syria/Ma'loula	44	4.55		Chiaroni et al., 2010
Syria/North East (Assyrian)	30	0.00	0.000	Chiaroni et al., 2010
Syria/Sednaya	14	0.00	0.000	Chiaroni et al., 2010
United Arab Emirates	164	0.00	0.000	Cadenas et al., 2008
Yemen	62	4.84		Cadenas et al., 2008
Iran
Azerbaijan Gharbi	102	6.86		Present study
Azerbaijan Gharbi+Tehran (Assyrian)			0.113 (7)	Present study
Fars	44	2.27		Present study
Gilan	64	10.94		Present study
Gilan+Mazandaran			0.480 (8)	Present study
Golestan	68	0.00	0.000	Present study
Hormozgan	192	0.00	0.000	Present study
Isfahan	11	0.00	0.000	Present study
Khorasan	59	5.08		Present study
Khuzestan	57	1.75		Present study
Kurdistan	59	1.69		Present study
Lorestan	50	2.00		Present study
Mazandaran	72	4.17		Present study
Sistan Baluchestan	24	0.00	0.000	Present study
Tehran	56	1.78		Present study
Yazd	80	2.50		Present study
Asia
Cambodia (Austro-Asiatic)	6	0.00	0.000	Sengupta et al., 2006
China (Sino-Tibetan+Altaic)	128	0.00	0.000	Sengupta et al., 2006
India	104	0.00	0.000	Fornarino et al., 2009
India (Indo-European)	49	0.00	0.000	Sengupta et al., 2006
India (Tibeto-Burman)	87	0.00	0.000	Sengupta et al., 2006
Nepal/Terai	173	0.00	0.000	Fornarino et al., 2009
Pakistan (Indo-European)	65	0.00	0.000	Sengupta et al., 2006
Siberia	228	0.00	0.000	Pakendorf et al., 2006
Siberia (Altaic)	18	0.00	0.000	Sengupta et al., 2006
(a) Variance calculated on 8 loci (DYS19, DYS388, DYS389I, DYS389II, DYS390, DYS391, DYS392, DYS439)
(b) The number of Y-chromosomes used for variance evaluation is shown in parentheses
(c) Defined as in Chiaroni et al., 2010
References
Al-Zahery N, Pala M, Battaglia V, Grugni V, Hamod MA, et al. (2011) In search of the genetic footprints of Sumerians: a survey of Y-chromosome and mtDNA variation in the Marsh Arabs of Iraq. BMC Evol Biol 11: 288.
Balanovsky O, Rootsi S, Pshenichnov A, Kivisild T, Churnosov M, et al. (2008) Two sources of the Russian patrilineal heritage in their Eurasian context. Am J Hum Genet 82: 236-250.
Battaglia V, Fornarino S, Al-Zahery N, Olivieri A, Pala M, et al. (2009) Y-chromosomal evidence of the cultural diffusion of agriculture in Southeast Europe. Eur J Hum Genet 17: 820-830.
Cadenas AM, Zhivotovsky LA, Cavalli-Sforza LL, Underhill PA, Herrera RJ (2008) Y-chromosome diversity characterizes the Gulf of Oman. Eur J Hum Genet 16: 374-386.
Cann HM, de Toma C, Cazes L, Legrand MF, Morel V, et al. (2002) A human genome diversity cell line panel. Science 296:261-262.
Capelli C, Redhead N, Abernethy JK, Gratrix F, Wilson JF, et al. (2003) A Y chromosome census of the British Isles. Curr Biol 13: 979-984.
Chiaroni J, King RJ, Myres NM, Henn BM, Ducourneau A, et al. (2010) The emergence of Y-chromosome haplogroup J1e among Arabic-speaking populations. Eur J Hum Genet 18: 348-353.
Cinnioğlu C, King R, Kivisild T, Kalfoğlu E, Atasoy S, et al. (2004) Excavating Y-chromosome haplotype strata in Anatolia. Hum Genet 114: 127-148.
Fornarino S, Pala M, Battaglia V, Maranta R, Achilli A, et al. (2009) Mitochondrial and Y-chromosome diversity of the Tharus (Nepal): a reservoir of genetic variation. BMC Evol Biol 9: 154.
Hassan HY, Underhill PA, Cavalli-Sforza LL, Ibrahim ME (2008) Y-chromosome variation among Sudanese: restricted gene flow, concordance with language, geography, and history. Am J Phys Anthropol 137: 316-323.
Luis JR, Rowold DJ, Regueiro M, Caeiro B, Cinnioğlu C, et al. (2004) The Levant versus the Horn of Africa: evidence for bidirectional corridors of human migrations. Am J Hum Genet 74: 532-544.
Pakendorf B, Novgorodov IN, Osakovskij VL, Danilova AP, Protod'jakonov AP, et al. (2006) Investigating the effects of prehistoric migrations in Siberia: genetic variation and the origins of Yakuts. Hum Genet 120: 334-353.
Rosa A, Ornelas C, Jobling MA, Brehm A, Villems R (2007) Y-chromosomal diversity in the population of Guinea-Bissau: a multiethnic perspective. BMC Evol Biol 7: 124.
Semino O, Magri C, Benuzzi G, Lin AA, Al-Zahery N, et al. (2004) Origin, diffusion, and differentiation of Y-chromosome haplogroups E and J: inferences on the neolithization of Europe and later migratory events in the Mediterranean area. Am J Hum Genet 74: 1023-1034 Epub 2004 Apr 1026.
Sengupta S, Zhivotovsky LA, King R, Mehdi SQ, Edmonds CA, et al. (2006) Polarity and temporality of high-resolution y-chromosome distributions in India identify both indigenous and exogenous expansions and reveal minor genetic influence of Central Asian pastoralists. Am J Hum Genet 78: 202-221.
Shlush LI, Behar DM, Yudkovsky G, Templeton A, Hadid Y, et al. (2008) The Druze: a population genetic refugium of the Near East. PLoS One 3: e2105.
Tofanelli S, Ferri G, Bulayeva K, Caciagli L, Onofri V, et al. (2009) J1-M267 Y lineage marks climate-driven pre-historical human displacements. Eur J Hum Genet 17: 1520-1524.
Veeramah KR, Connell BA, Pour NA, Powell A, Plaster CA, et al. (2010) Little genetic differentiation as assessed by uniparental markers in the presence of substantial language variation in peoples of the Cross River region of Nigeria. BMC Evol Biol 10: 92.
Zei G, Lisa A, Fiorani O, Magri C, Quintana-Murci L, et al. (2003) From surnames to the history of Y chromosomes: the Sardinian population as a paradigm. Eur J Hum Genet 11: 802-807.
