# Supplementary material for: Ancient Migratory Events in the Middle East: New Clues from the Y-Chromosome Variation of Modern Iranians
Source: PLoS One. 2012 Jul 18;7(7):e41252. doi: 10.1371/journal.pone.0041252 (PMC3399854; doi:10.1371/journal.pone.0041252)
Supplement: Table S4 — Haplogroup J2-M67 frequencies and variances. (XLSX) [file pone.0041252.s008.xlsx]

## Sheet: Table S4
Table S4. Haplogroup J2-M67 frequencies and variances.
Country/Region (Population)	N	J2-M67		Reference
		Frequency (%)	Variance(a,b)
Africa
Algeria	93	5.38	0.243 (5)	Robino et al., 2008
Egypt	147	2.00		Abu-Amero et al., 2009
Ethiopia (Amhara)	48	2.08		Semino et al., 2004
Ethiopia (Oromo)	78	0.00	0.000	Semino et al., 2004
Senegal	139	0.00	0.000	Hassan et al., 2008
Somalia	201	1.40		Abu-Amero et al., 2009
Sudan	171	0.00	0.000	Underhill et al., 2000
Tunisia	73	0.00	0.000	Semino et al., 2004
Europe
Albania	55	3.64		Semino et al., 2004; Battaglia et al., 2009
Balkans			0.143 (5)	Battaglia et al., 2009
France (Bearnais)	27	0.00	0.000	Semino et al., 2004
Bosnia (Bosniacs)	84	4.76		Battaglia et al., 2009
Bosnia (Serbs)	81	0.00	0.000	Battaglia et al., 2009
Bosnia (Croats)	90	0.00	0.000	Battaglia et al., 2009
Bulgaria/West	396	0.76		Unpublished data
Bulgaria/Center	262	1.53		Unpublished data
Bulgaria/East	82	0.00	0.000	Unpublished data
Greece/Crete	193	5.18	0.375 (10)	King et al., 2008
Cyprus	166	4.22	0.401 (7)	Zalloua et al., 2008
Croatia	89	0.00	0.000	Battaglia et al., 2009
Croatia/Osijek	29	3.45		Battaglia et al., 2009
Czech Republic	75	0.00	0.000	Battaglia et al., 2009
France (Basque)	44	0.00	0.000	Semino et al., 2004
France/ Provence	51	1.96		King et al., 2011
FYROM	64	1.56		Battaglia et al., 2009
Greece	388	3.61	0.187 (14)	Battaglia et al., 2009; King et al., 2008; Present paper
Greece (Macedonian)	57	3.50		Battaglia et al., 2009
Hungary	53	1.89		Battaglia et al., 2009
Italy/Apulia	86	2.33		Semino et al., 2004
Italy/Calabria	88	2.27		Semino et al., 2004; Present paper
Italy/Calabria (Albanians)	52	7.69		Semino et al., 2004
Italy/Central	203	7.90	0.323 (18)	Semino et al., 2004; Present paper
Italy/North East	68	7.35		Battaglia et al., 2009; Present paper
Italy/Sardinia	522	3.64	0.205 (12)	Zei et al. 2003; Semino et al. 2004; Unpublished data
Italy/Sicily	72	2.78	0.242 (8)	Semino et al., 2004; Present paper
Italy/Piedmont	105	0.95		Semino et al., 2004; Present paper
Latvia	113	0.00	0.000	Lappalainen et al., 2008
Lithuania	164	0.00	0.000	Lappalainen et al., 2008
Moldova (Gagauzes)	48	0.00	0.000	Varzari et al., 2009
Poland	99	0.00	0.000	Battaglia et al., 2009; Present paper
Portugal	126	19.80	0.030 (25)	Gusmao et al., 2008
Russia/Nenet	54	0.00	0.000	Wells et al., 2001
Russia/Mezen	54	0.00	0.000	Balanovsky et al. ,2008
Russia/Pinega	114	0.00	0.000	Balanovsky et al. ,2008
Russia/Porhov	57	0.00	0.000	Balanovsky et al. ,2008
Saami	48	0.00	0.000	Rosser et al., 2000
Slovenia	75	0.00	0.000	Battaglia et al., 2009
Spain/Andalusia	93	3.20		Semino et al., 2004
Spain (Basque)	55	0.00	0.000	Semino et al., 2004
Spain (Catalans)	29	3.45		Semino et al., 2004; Present paper
The Netherland	34	0.00	0.000	Semino et al., 2004
Ukraine	92	1.09		Battaglia et al., 2009; Present paper
Asia Minor
Turkey			0.240 (19)	Cinnioglu et al., 2004
Turkey/Istanbul	73	5.48		Semino et al., 2004; Present paper
Turkey/Konya	130	3.85		Semino et al., 2004; Present paper
Turkey/Phokaia	31	3.23		King et al., 2011
Turkey/Smyrna	58	3.45		King et al., 2011
Turkey/Nea Nikomedeia	57	0.00	0.000	King et al., 2011
Turkey/Seklo-Dimini	57	3.51		King et al., 2011
Turkey/Lerna-Franchthi Cave	57	5.26		King et al., 2011
Turkey/Area 1	52	7.69		King et al., 2011
Turkey/Area6	33	3.03		King et al., 2011
Turkey/Area 7	90	2.22		King et al., 2011
Turkey/Area 8	30	0.00	0.000	King et al., 2011
Caucasus
Caucasus			0.211 (12)	Battaglia et al., 2009
Balkarians	38	5.30		Battaglia et al., 2009
Daghestan	174	0.00	0.000	Marchani et al., 2008
Georgia	66	15.20		Battaglia et al., 2009
Middle East
Iraq/Baghdad	154	5.19		Al-Zahery et al., 2011
Iraq (Marsh Arab)	143	0.00	0.000	Al-Zahery et al., 2011
Israel (Ashkenazi)	82	4.88		Semino et al., 2004; Present paper
Israel (Sephardi)	43	2.33		Semino et al., 2004; Present paper
Jordan	146	4.79		Abu-Amero et al., 2009
Lebanon	916	7.75	0.207 (45)	Zalloua et al., 2008
Oman	121	0.80		Abu-Amero et al., 2009
Palestine	367	4.36	0.402 (16)	Zalloua et al., 2008
Qatar	72	1.39		Cadenas et al., 2008
Syria	202	3.47	0.129 (5)	Zalloua et al., 2008
United Arab Emirates	164	0.61		Cadenas et al., 2008
Yemen	62	4.84		Cadenas et al., 2008
Iran
Iran	938		0.374 (16)	Present paper
Azerbaijan Gharbi	102	2.94		Present paper
Fars	44	4.55		Present paper
Fars+Hormozgan+ Isfahan			0.390 (6)	Present paper
Gilan	64	4.69		Present paper
Golestan	68	0.00	0.000	Present paper
Hormozgan	192	2.60		Present paper
Isfahan	11	9.09		Present paper
Khorasan	59	0.00	0.000	Present paper
Khuzestan	57	0.00	0.000	Present paper
Kurdistan	59	5.08		Present paper
Lorestan	50	4.00		Present paper
Mazandaran	72	1.39		Present paper
Sistan Baluchestan	24	0.00	0.000	Present paper
Tehran	56	5.36		Present paper
Yazd	80	0.00	0.000	Present paper
Asia
Asia/Central	184	1.09		Sengupta et al., 2006
Asia/East	176	0.00	0.000	Semino et al., 2004
China	65	0.00	0.000	Sengupta et al., 2006
India	728	0.00	0.000	Semino et al., 2004
Kazakhstan	54	0.00	0.000	Wells et al., 2001
Mongolia	24	0.00	0.000	Wells et al., 2001
Nepal	50	0.00	0.000	Sengupta et al., 2006
Nepal (Tharu)	171	0.00	0.000	Fornarino et al., 2009
Pakistan	176	1.14		Sengupta et al., 2006
Tuvinia	42	0.00	0.000	Wells et al., 2001
(a)Variance calculated on 7 loci (DYS19, DYS389I, DYS389II, DYS390, DYS391, DYS392, DYS393)
(b) The number of Y-chromosomes used for variance evaluation is shown in parentheses
References
Abu-Amero KK, Hellani A, González AM, Larruga JM, Cabrera VM, et al. (2009) Saudi Arabian Y-chromosome diversity and its relationship with nearby regions. BMC Genet 10: 59.
Al-Zahery N, Pala M, Battaglia V, Grugni V, Hamod MA, et al. (2011) In search of the genetic footprints of Sumerians: a survey of Y-chromosome and mtDNA variation in the Marsh Arabs of Iraq. BMC Evol Biol 11: 288.
Balanovsky O, Rootsi S, Pshenichnov A, Kivisild T, Churnosov M, et al. (2008) Two sources of the Russian patrilineal heritage in their Eurasian context. Am J Hum Genet 82: 236-250.
Battaglia V, Fornarino S, Al-Zahery N, Olivieri A, Pala M, et al. (2009) Y-chromosomal evidence of the cultural diffusion of agriculture in Southeast Europe. Eur J Hum Genet 17: 820-830.
Cadenas AM, Zhivotovsky LA, Cavalli-Sforza LL, Underhill PA, Herrera RJ (2008) Y-chromosome diversity characterizes the Gulf of Oman. Eur J Hum Genet 16: 374-386.
Cinnioğlu C, King R, Kivisild T, Kalfoğlu E, Atasoy S, et al. (2004) Excavating Y-chromosome haplotype strata in Anatolia. Hum Genet 114: 127-148.
Fornarino S, Pala M, Battaglia V, Maranta R, Achilli A, et al. (2009) Mitochondrial and Y-chromosome diversity of the Tharus (Nepal): a reservoir of genetic variation. BMC Evol Biol 9: 154.
Gusmão A, Gusmão L, Gomes V, Alves C, Calafell F, et al. (2008) A perspective on the history of the Iberian gypsies provided by phylogeographic analysis of Y-chromosome lineages. Ann Hum Genet 72: 215-227.
Hassan HY, Underhill PA, Cavalli-Sforza LL, Ibrahim ME (2008) Y-chromosome variation among Sudanese: restricted gene flow, concordance with language, geography, and history. Am J Phys Anthropol 137: 316-323.
King RJ, Ozcan SS, Carter T, Kalfoğlu E, Atasoy S, et al. (2008) Differential Y-chromosome Anatolian influences on the Greek and Cretan Neolithic. Ann Hum Genet 72: 205-214.
King RJ, Dicristofaro J, Kouvatsi A, Triantaphyllidis C, Scheidel W, et al. (2011) The coming of the Greeks to Provence and Corsica: Y-chromosome models of archaic Greek colonization of the western Mediterranean. BMC Evol Biol 11: 69.
Lappalainen T, Laitinen V, Salmela E, Andersen P, Huoponen K, et al. (2008) Migration waves to the Baltic Sea region. Ann Hum Genet 72: 337-348.
Marchani EE, Watkins WS, Bulayeva K, Harpending HC, Jorde LB (2008) Culture creates genetic structure in the Caucasus: autosomal, mitochondrial, and Y-chromosomal variation in Daghestan. BMC Genet 9: 47.
Robino C, Crobu F, Di Gaetano C, Bekada A, Benhamamouch S, et al. (2008) Analysis of Y-chromosomal SNP haplogroups and STR haplotypes in an Algerian population sample. Int J Legal Med 122: 251-255.
Rosser ZH, Zerjal T, Hurles ME, Adojaan M, Alavantic D, et al. (2000) Y-chromosomal diversity in Europe is clinal and influenced primarily by geography, rather than by language. Am J Hum Genet 67: 1526-1543.
Semino O, Magri C, Benuzzi G, Lin AA, Al-Zahery N, et al. (2004) Origin, diffusion, and differentiation of Y-chromosome haplogroups E and J: inferences on the neolithization of Europe and later migratory events in the Mediterranean area. Am J Hum Genet 74: 1023-1034.
Sengupta S, Zhivotovsky LA, King R, Mehdi SQ, Edmonds CA, et al. (2006) Polarity and temporality of high-resolution y-chromosome distributions in India identify both indigenous and exogenous expansions and reveal minor genetic influence of Central Asian pastoralists. Am J Hum Genet 78: 202-221.
Underhill PA, Shen P, Lin AA, Jin L, Passarino G, et al. (2000) Y chromosome sequence variation and the history of human populations. Nat Genet 26: 358-361.
Varzari A, Kharkov V, Stephan W, Dergachev V, Puzyrev V, et al. (2009) Searching for the origin of Gagauzes: inferences from Y-chromosome analysis. Am J Hum Biol 21: 326-336.
Wells RS, Yuldasheva N, Ruzibakiev R, Underhill PA, Evseeva I, et al. (2001) The Eurasian heartland: a continental perspective on Y-chromosome diversity. Proc Natl Acad Sci U S A 98: 10244-10249.
Zalloua PA, Xue Y, Khalife J, Makhoul N, Debiane L, et al. (2008) Y-chromosomal diversity in Lebanon is structured by recent historical events. Am J Hum Genet 82: 873-882.
Zei G, Lisa A, Fiorani O, Magri C, Quintana-Murci L, et al. (2003) From surnames to the history of Y chromosomes: the Sardinian population as a paradigm. Eur J Hum Genet 11: 802-807.
