# Supplementary material for: Ancient Migratory Events in the Middle East: New Clues from the Y-Chromosome Variation of Modern Iranians
Source: PLoS One. 2012 Jul 18;7(7):e41252. doi: 10.1371/journal.pone.0041252 (PMC3399854; doi:10.1371/journal.pone.0041252)
Supplement: Table S7 — Age of microsatellite variation and Standard Error within the main haplogroups. (XLS) [file pone.0041252.s011.xls]

## Sheet: Foglio1
Table S7. Age of microsatellite variation and Standard Error within the main haplogroups.
Country/region (population)	J1-M267*	J2a-M410*	J2a-PAGE55*	J2a-M47	J2a-M67*	J2a-M92	J2a-M530	R1a-M198*	R1b-M269*	Reference(a)
Algeria					9.3 ± 4.9 (5)					Robino et al., 2008
Altai								5.6 ± 2.5 (13)		Underhill et al., 2010
Assyrian(b)	5.7 ± 2.9 (10)									Chiaroni et al., 2010
Austria								3.4 ± 1.7 (4)		Underhill et al., 2010
Balkans			13.4 ± 5.4 (6)		6.2 ± 2.5 (5)		9.2 ± 2.8 (7)			Unpublished data; Battaglia et al., 2009; Battaglia et al., 2009; Unpublished data
Bulgaria							15.7 ± 7.5 (5)			Unpublished data
Caucasus		12.9 ± 7.8 (6)			7.3 ± 3.9 (12)		15.3 ± 4.7 (5)	13.6 ± 3.8 (12)		Unpublished data; Battaglia et al., 2009; Unpublished data; Underhill et al., 2010
Crete					12.9 ± 4.5 (10)	4.1 ± 1.5 (5)		12.2 ± 3.0 (10)		King et al., 2008; King et al., 2008; Underhill et al., 2010
Cyprus					14.8 ± 4 (7)					King et al., 2008
Denmark								10.2 ± 3.2 (12)		Underhill et al., 2010
Egypt								12.5 ± 3.8 (4)		Underhill et al., 2010
Estonia								9.4 ± 2.1 (14)		Underhill et al., 2010
Germany								12.1 ± 2.9 (27)		Underhill et al., 2010
Greece					7.0 ± 1.6 (14)	9.7 ± 2.7 (8)		9.4 ± 2.7 (13)		King et al., 2008 and Unpublished data; King et al., 2008 and Unpublished data; Underhill et al., 2010
Hungary								11.2 ± 2.6 (15)		Underhill et al., 2010
India								16.5 ± 3.5 (113)		Underhill et al., 2010
IRAN	26.3 ± 8.2 (25)	15.7 ± 3.2 (15)	16.3 ± 5.3 (22)	7.4 ± 1.9 (13)	15.8 ± 4.5 (16)	1.3 ± 1.3 (4)	18.3 ± 3.6 (32)	14.6 ± 4 (49)	11.5 ± 3.3 (6)	Unpublished data
Iran/Center			18.8 ± 5.8 (5)				23.1 ± 8.7 (8)			Unpublished data
Iran/Central South					15.1 ± 4.0 (6)					Unpublished data
Iran/North	20.9 ± 9.6 (8)	17.6 ± 6.7 (6)								Unpublished data
Iran/North West			10.4 ± 2.1 (8)	7.0 ± 4.2 (4)	15.0 ± 5.4 (10)		19.2 ± 6.4 (7)			Unpublished data
Iran/South							8.0 ± 2.4 (4)	15.2 ± 4.2 (14)		Unpublished data
Iran/West				7.2± 2.4 (5)						Unpublished data
Azerbaijan Gharbi	3.6 ± 1.9 (5)							5.4 ± 2.3 (5)		Unpublished data
Iran (Assyrians)	5.2 ± 2.2 (7)									Unpublished data
Gilan								8.2 ± 2.5 (5)		Unpublished data
Golestan								13.6 ± 4.2 (5)		Unpublished data
Hormozgan			14.5 ± 7.7 (4)				8.0 ± 2.4 (4)			Unpublished data
Khorasan								12.7 ± 3.0 (5)		Unpublished data
Kurdistan								9.3 ±4.3 (5)		Unpublished data
Mazandaran				7.0 ± 2.0 (4)			23.8 ± 6.8 (6)	7.2 ± 2.4 (5)		Unpublished data
Yazd								14.5 ± 4.5 (5)		Unpublished data
Iraq				8.0 ± 4.9 (4)						Al-Zahery et al., 2003 and Unpublished data
Iraqi/Kurdistan	17.0 ± 4.3 (4)									Chiaroni et al., 2010
Iraq (Marsh Arabs)	11.6 ± 4.0 (10)									Al-Zahery et al., 2011 and Unpublished data
Israel							10.6 ± 5.3 (8)			Unpublished data
Italy								5.7 ± 1.4 (8)		Underhill et al., 2010
Italy/Apulia							19.5 ± 5.2 (6)			Unpublished data
Italy/Calabria							6.7 ± 2.1 (6)			Unpublished data
Italy/Center					13.2 ± 4.2 (18)	11.4 ± 5.7 (5)				Unpublished data
Italy/Sardinia					8.0 ± 2.7 (12)	4.1 ± 2.1 (5)	13.6 ± 4.1 (8)			Unpublished data
Italy/Sicily					9.7 ± 2.1 (8)					Di Gaetano et al. 2009
Kyrgyzstan								6.9 ± 2.1 (63)		Underhill et al., 2010
Lebanon					8.6 ± 2.9 (45)		8.9 ± 2.0 (5)			Zalloua et al., 2008; Unpublished data
Nepal			14.3 ± 4.9 (17)					17.5 ± 5.0 (36)		Unpublished data; Fornarino et al., 2009
Oman								14.0 ± 3.2 (11)		Underhill et al., 2010
Pakistan								17.5 ± 3.2 (43)		Underhill et al., 2010
Palestine					15.5 ± 4.7 (16)					Zalloua et al., 2008
Poland								13.6 ± 4.2 (19)		Underhill et al., 2010
Portugal					1.2 ± 1.0 (25)					Gusmao et al., 2008
Romania									8.2 ± 2.8 (5)	Myres et al., 2011
Russia								9.5 ± 4.1 (10)		Underhill et al., 2010
Slovakia								13.4 ± 2.9 (68)		Underhill et al., 2010
Slovenia								8.1 ± 2.0 (32)		Underhill et al., 2010
Syria					6.2 ± 2.9 (5)					Zalloua et al., 2008
Syria-Israel	10.9 ± 3.4 (5)									Chiaroni et al., 2010
Turkey				4.7 ± 2.8 (6)	9.8 ± 2.9 (19)	15.1 ± 6.1 (13)	14.1 ± 3.7 (12)	10.8 ± 2.7 (34)	10.9 ± 2.6 (10)	Cinnioglu et al., 2004; Cinnioglu et al., 2004; Cinnioglu et al., 2004; Unpublished data; Underhill et al., 2010; Myres et al., 2011
Turkey/East	27.2 ± 9.3 (10)									Chiaroni et al., 2010
Turkey/West-Central	24.5 ±10.6 (6)									Chiaroni et al., 2010
United Arab Emirates								12.1 ± 5.0 (12)		Unpublished data
Ukraine								8.3 ± 2.5 (18)		Unpublished data
	27.9 ±10.9 (90)	17.6 ± 3.6 (22)	16.2 ± 4.4 (49)	6.8 ± 1.4 (23)	11.8 ± 3.2 (222)	19.8 ± 7.0 (43)	15.2 ± 2.8 (104)	13.7 ± 2.4 (692)	13.3 ± 2.6 (37)
In parenteses, the number of the Y chromosomes used for the evaluations.
(a) When the age of more than one haplogroup has been estimated per population, all corresponding references are listed.
(b) Defined as in Chiaroni et al., 2010
References
Al-Zahery N, Semino O, Benuzzi G, Magri C, Passarino G, et al. (2003) Y-chromosome and mtDNA polymorphisms in Iraq, a crossroad of the early human dispersal and of post-Neolithic migrations. Mol Phylogenet Evol 28: 458-472.
Al-Zahery N, Pala M, Battaglia V, Grugni V, Hamod MA, et al. (2011) In search of the genetic footprints of Sumerians: a survey of Y-chromosome and mtDNA variation in the Marsh Arabs of Iraq. BMC Evol Biol 11: 288.
Battaglia V, Fornarino S, Al-Zahery N, Olivieri A, Pala M, et al. (2009) Y-chromosomal evidence of the cultural diffusion of agriculture in Southeast Europe. Eur J Hum Genet 17: 820-830.
Chiaroni J, King RJ, Myres NM, Henn BM, Ducourneau A, et al. (2010) The emergence of Y-chromosome haplogroup J1e among Arabic-speaking populations. Eur J Hum Genet 18: 348-353.
Cinnioğlu C, King R, Kivisild T, Kalfoğlu E, Atasoy S, et al. (2004) Excavating Y-chromosome haplotype strata in Anatolia. Hum Genet 114: 127-148.
Di Gaetano C, Cerutti N, Crobu F, Robino C, Inturri S, et al. (2009) Differential Greek and northern African migrations to Sicily are supported by genetic evidence from the Y chromosome. Eur J Hum Genet 17: 91-99.
Fornarino S, Pala M, Battaglia V, Maranta R, Achilli A, et al. (2009) Mitochondrial and Y-chromosome diversity of the Tharus (Nepal): a reservoir of genetic variation. BMC Evol Biol 9: 154.
Gusmão A, Gusmão L, Gomes V, Alves C, Calafell F, et al. (2008) A perspective on the history of the Iberian gypsies provided by phylogeographic analysis of Y-chromosome lineages. Ann Hum Genet 72: 215-227.
King RJ, Ozcan SS, Carter T, Kalfoğlu E, Atasoy S, et al. (2008) Differential Y-chromosome Anatolian influences on the Greek and Cretan Neolithic. Ann Hum Genet 72: 205-214.
Myres NM, Rootsi S, Lin AA, Järve M, King RJ, et al. (2011) A major Y-chromosome haplogroup R1b Holocene era founder effect in Central and Western Europe. Eur J Hum Genet 19: 95-101.
Robino C, Crobu F, Di Gaetano C, Bekada A, Benhamamouch S, et al. (2008) Analysis of Y-chromosomal SNP haplogroups and STR haplotypes in an Algerian population sample. Int J Legal Med 122: 251-255.
Underhill PA, Myres NM, Rootsi S, Metspalu M, Zhivotovsky LA, et al. (2010) Separating the post-Glacial coancestry of European and Asian Y chromosomes within haplogroup R1a. Eur J Hum Genet 18: 479-484.
Zalloua PA, Xue Y, Khalife J, Makhoul N, Debiane L, et al. (2008) Y-chromosomal diversity in Lebanon is structured by recent historical events. Am J Hum Genet 82: 873-882.
